# Supplementary material for: Fasciola hepatica Extracellular Vesicles isolated from excretory-secretory products using a gravity flow method modulate dendritic cell phenotype and activity
Source: PLoS Negl Trop Dis. 2020 Sep 8;14(9):e0008626. doi: 10.1371/journal.pntd.0008626 (PMC7521716; doi:10.1371/journal.pntd.0008626)
Supplement: S2 Table — (XLSX) [file pntd.0008626.s004.xlsx]

## Sheet: Sheet1
S2 Table: Gene Ontology enrichment
Cellular Component
GO ID	Description	Observed gene count	FDR
GO:0005575	cellular component	16	9.16e-09
GO:0005623	cell	15	1.37e-08
GO:0005622	intracellular	14	2.73e-08
GO:0044424	intracellular part	13	1.36e-07
GO:0005737	cytoplasm	11	2.28e-07
GO:0005856	cytoskeleton	4	0.00145
GO:0005875	microtubule associated complex	3	0.00342
GO:0015630	microtubule cytoskeleton	3	0.00342
GO:0043234	protein complex	4	0.00342
Biological Process
GO ID	Description	Observed gene count	FDR
GO:0008150	biological_process	24	1.2e-15
GO:0008152	metabolic process	21	9.6e-15
GO:0009987	cellular process	17	1.27e-11
GO:0044699	single-organism process	15	1.67e-11
GO:0044763	single-organism cellular process	14	2.55e-11
GO:0071704	organic substance metabolic process	15	1.72e-10
GO:0044710	single-organism metabolic process	12	2.01e-10
GO:0046939	nucleotide phosphorylation	8	3.4e-10
GO:0034641	cellular nitrogen compound metabolic process	11	4.62e-10
GO:0044238	primary metabolic process	14	9.96e-10
GO:0009117	nucleotide metabolic process	9	1.42e-09
GO:0006096	glycolytic process	7	1.8e-09
GO:0044237	cellular metabolic process	13	1.8e-09
GO:1901564	organonitrogen compound metabolic process	10	1.8e-09
GO:0009167	purine ribonucleoside monophosphate metabolic process	8	2.65e-09
GO:0009150	purine ribonucleotide metabolic process	8	7.19e-09
GO:0046128	purine ribonucleoside metabolic process	8	7.19e-09
GO:0007017	microtubule-based process	3	0.00142
GO:0055114	oxidation-reduction process	4	0.00381
GO:0019538	protein metabolic process	5	0.00536
GO:1901576	organic substance biosynthetic process	4	0.00539
GO:0006006	glucose metabolic process	2	0.00801
GO:0046835	carbohydrate phosphorylation	2	0.00801
GO:0044271	cellular nitrogen compound biosynthetic process	3	0.0151
GO:1901566	organonitrogen compound biosynthetic process	3	0.0151
GO:0006508	proteolysis	3	0.0217
GO:0006979	response to oxidative stress	2	0.0221
Molecular Function
GO ID	Description	Observed gene count	FDR
GO:0003674	molecular_function	27	1.3e-19
GO:0003824	catalytic activity	19	5.78e-15
GO:0005488	binding	19	1.79e-13
GO:0043167	ion binding	16	4.96e-13
GO:0000166	nucleotide binding	9	5.19e-08
GO:0005524	ATP binding	7	2.19e-07
GO:0046872	metal ion binding	10	2.19e-07
GO:0097159	organic cyclic compound binding	10	2.19e-07
GO:1901363	heterocyclic compound binding	10	2.19e-07
GO:0016740	transferase activity	7	4.94e-07
GO:0016301	kinase activity	4	7.28e-05
GO:0016787	hydrolase activity	5	0.000219
GO:0005509	calcium ion binding	4	0.000445
GO:0016491	oxidoreductase activity	4	0.00234
GO:0008234	cysteine-type peptidase activity	3	0.00307
GO:0004197	cysteine-type endopeptidase activity	2	0.0072
GO:0016773	phosphotransferase activity, alcohol group as acceptor	2	0.0072
GO:0016829	lyase activity	2	0.0072
GO:0019200	carbohydrate kinase activity	2	0.0072
GO:0004364	glutathione transferase activity	2	0.0184
GO:0016209	antioxidant activity	2	0.0184
